# Supplementary material for: Comparison of electrochemical performances of olivine NaFePO4in sodium-ion batteries and olivine LiFePO4in lithium-ion batteries
Source: Royal Society of Chemistry journal article supplement (doi:10.1039/c2nr32758a), 2012-11-23
Supplement: c2nr32758a.pdf [file c2nr32758a.pdf]

## Supplementary Information

### Comparison of Electrochemical Performances of Olivine $\text{NaFePO}_4$ in Sodium-Ion Batteries and Olivine $\text{LiFePO}_4$ in Lithium-Ion Batteries

Yujie Zhu, Yunhua Xu, Yihang Liu, Chao Luo and Chunsheng Wang\*

*Thermogravimetric analysis (TGA) test for carbon-coated  $\text{LiFePO}_4$ .*

Thermogravimetric analysis (TGA) is used to determine the percentage of carbon in the carbon-coated  $\text{LiFePO}_4$  sample. The powder sample is loaded into the TGA equipment (*CAHN TG 2131*, USA) and heated from room temperature to 700 °C in air atmosphere with a heating rate of 10 °C per min. As shown in Figure S1, the 13% mass loss above 500 °C corresponds to the oxidation of carbon in the sample.

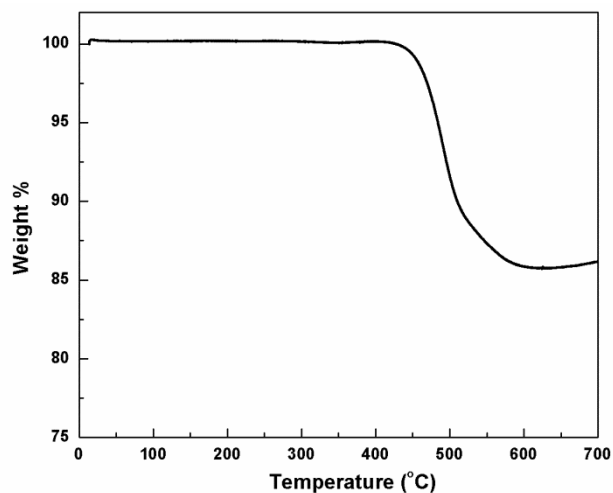

**Figure S1** TGA result of carbon-coated  $\text{LiFePO}_4$ .
